# Supplementary material for: Project Portfolio Selection and Scheduling with Resource Allocation, Synergies, and Project Divisibility
Source: Hindawi journal article supplement (doi:10.1155/2021/4163287), 2021-12-27
Supplement: f1 [file 4163287.f1.docx]

**Mathematical Problems in Engineering**

**Project portfolio selection and scheduling with resource allocation, synergies and project divisibility**

Nancy M. Arratia-Martinez 1,1 Nelly M. Hernandez-Gonzalez,1 and Fernando Lopez-Irarragorri 2

**Supplementary materials**

Table S1 Notations used in this paper

| Notation | Description |
| --- | --- |
|  | Set of tasks indexed by . |
|  | Set of projects indexed by . |
|  | Set of areas indexed by . |
|  | Set of synergies indexed by |
|  | Set of periods indexed by . |
|  | Set of resources index by . |
|  | Set of renewable and non-renewable resources, respectively. |
| , | Sets of synergies that implies reduction and increment in consumption of resources, respectively. |
|  | Set of tasks that defines the synergy . |
| , | Minimum and maximum resources of type needed for carrying out a task of project in period |
|  | Level of membership to the fuzzy predicate that “task of project has enough support for resource type in period ”. |
|  | function parameters. |
|  | Impact value of project |
|  | Relative importance of the task on the impact of project |
|  | Duration of task of project |
|  | Effects in the impact measured by active synergy in the period |
|  | Additional value (positive or negative) in the consumption of resources of tasks belonging to the synergy in the period . |
|  | Amount available of resource type in the period . |
|  | Minimum and maximum amount of resource type to be allocated in the period . |
|  | Allocation limits of resource type of project |
|  | Minimum and a maximum quantity of needed tasks to active synergy . |
|  | A large number used to complement the constraint (23), to stablish a maximum amount of resources to the tasks. |
|  | A large number, allowing to complement the calculation of the first period in which the task in project is active (see constraints (30-32)). |
|  | A large number, allowing to complement the calculation of the last period in which the task in project is active (see constraints (33-35)). |
|  | Set of technical synergies indexed by . |
| , | Minimum and maximum number of synergies to be declared active in the set . |
|  | Tasks with a sequential precedence relation. |
|  | Set of task pairs under a sequential precedence relation. |
|  | Set of task pairs with a minimum and maximum number of periods between the end and start period of the conditioned tasks indexed by |
|  | Set of task pairs with a minimum or a maximum period in which a task must be started. |
| , | Minimum and maximum number of periods between the end and start period of the conditioned tasks . |
|  | Minimum or a maximum number of periods in which a task must be started. |
|  | Amount of resources to be allocated to task of project and resource type in the period . |
|  | If project is selected to be supported and financed. |
|  | If task of project is active or in execution in period . |
|  | If synergy is active in period . |
|  | Additional decision variables in order to obtain the variable. |
|  | The first period in which the task in project is active. |
|  | The last period in which the task in project is active. |
| R | Total number of precedence rules in an instance. |
| S | Total number of synergies in an instance. |
| H | Periods in time horizon in an instance. |
|  | Total number of tasks in an instance. |

Table S2. Average solution time and Gap of the solutions sets applying a tolerance of 10%.

|  | Average solution times (sec.) & Gap | | | | | |
| --- | --- | --- | --- | --- | --- | --- |
|  | Level for precedence rules. | | | | |  |
|  | 0% | | 2.50% | | 5% | |
| Subset | **Time** | **Gap** | **Time** | **Gap** | **Time** | **Gap** |
| P16T8S0A1H4R# | 0.89 | 3.15% | 0.70 | 2.73% | 0.88 | 5.04% |
| P16T8S0A1H6R# | 1.82 | 4.65% | 1.42 | 4.77% | 1.63 | 4.61% |
| P16T8S0A1H8R# | 3.72 | 5.52% | 2.48 | 4.52% | 2.60 | 6.45% |
| P16T8S1A1H4R# | 1.32 | 4.95% | 1.24 | 5.21% | 1.19 | 2.47% |
| P16T8S1A1H6R# | 2.47 | 5.24% | 2.21 | 5.69% | 2.32 | 4.94% |
| P16T8S1A1H8R# | 2.60 | 5.64% | 2.62 | 2.33% | 3.09 | 3.45% |
| P16T16S0A1H4R# | 3.84 | 5.23% | 3.59 | 4.58% | 3.21 | 5.74% |
| P16T16S0A1H6R# | 5.42 | 5.12% | 4.66 | 4.47% | 2.97 | 3.86% |
| P16T16S0A1H8R# | 3.85 | 4.14% | 3.48 | 3.20% | 2.78 | 4.86% |
| P16T16S2A1H4R# | 2.09 | 4.02% | 1.20 | 4.28% | 1.28 | 3.69% |
| P16T16S2A1H6R# | 3.80 | 5.61% | 2.22 | 6.33% | 2.11 | 6.12% |
| P16T16S2A1H8R# | 4.59 | 4.79% | 3.69 | 6.58% | 2.79 | 3.97% |
| P32T8S0A1H4R# | 2.21 | 2.48% | 2.79 | 0.84% | 3.41 | 2.16% |
| P32T8S0A1H6R# | 5.35 | 4.08% | 5.08 | 4.48% | 5.66 | 4.01% |
| P32T8S0A1H8R# | 6.78 | 2.52% | 6.21 | 1.49% | 7.30 | 2.13% |
| P32T8S2A1H4R# | 2.58 | 3.45% | 2.30 | 3.42% | 2.63 | 1.78% |
| P32T8S2A1H6R# | 4.56 | 4.39% | 2.57 | 1.53% | 3.08 | 0.89% |
| P32T8S2A1H8R# | 6.91 | 3.20% | 8.97 | 3.09% | 5.29 | 2.46% |
| P32T16S0A1H4R# | 6.99 | 2.39% | 6.79 | 0.91% | 6.59 | 0.66% |
| P32T16S0A1H6R# | 12.68 | 5.17% | 19.38 | 1.32% | 18.13 | 4.16% |
| P32T16S0A1H8R# | 103.93 | 1.37% | 30.12 | 2.40% | 17.39 | 1.73% |
| P32T16S5A1H4R# | 3.66 | 4.58% | 2.58 | 5.12% | 3.34 | 1.74% |
| P32T16S5A1H6R# | 5.36 | 3.30% | 5.99 | 3.94% | 11.77 | 2.73% |
| P32T16S5A1H8R# | 10.18 | 0.78% | 8.87 | 0.53% | 9.34 | 0.94% |
| P64T8S0A1H4R# | 18.83 | 0.83% | 22.11 | 1.16% | 20.15 | 1.31% |
| P64T8S0A1H6R# | 27.73 | 1.63% | 31.62 | 1.89% | 28.76 | 1.76% |
| P64T8S0A1H8R# | 4.59 | 2.53% | 8.12 | 2.15% | 3.69 | 4.06% |
| P64T8S5A1H4R# | 9.95 | 3.07% | 12.82 | 0.87% | 9.01 | 0.49% |
| P64T8S5A1H6R# | 10.99 | 4.69% | 10.21 | 2.35% | 17.13 | 3.45% |
| P64T8S5A1H8R# | 19.79 | 1.12% | 22.86 | 1.50% | 14.11 | 1.21% |
| P64T16S0A1H4R# | 35.30 | 0.57% | 35.13 | 1.10% | 36.76 | 1.42% |
| P64T16S0A1H6R# | 53.42 | 0.84% | 59.77 | 0.46% | 71.53 | 0.85% |
| P64T16S0A1H8R# | 5.16 | 0.89% | 3.47 | 2.27% | 4.64 | 4.09% |
| P64T16S10A1H4R# | 9.37 | 4.97% | 14.41 | 2.58% | 8.11 | 3.09% |
| P64T16S10A1H6R# | 16.69 | 2.46% | 51.05 | 3.46% | 10.94 | 4.52% |
| P64T16S10A1H8R# | 10.18 | 0.78% | 8.87 | 0.53% | 9.34 | 0.94% |
| P128T8S0A1H4R# | 29.06 | 0.37% | 29.14 | 0.34% | 31.66 | 0.15% |
| P128T8S0A1H6R# | 56.56 | 0.56% | 61.09 | 0.51% | 66.95 | 0.87% |
| P128T8S0A1H8R# | 127.28 | 1.18% | 121.62 | 1.18% | 129.75 | 0.68% |
| P128T8S10A1H4R# | 11.78 | 1.83% | 4.59 | 3.79% | 5.73 | 2.15% |
| P128T8S10A1H6R# | 13.67 | 0.59% | 8.78 | 8.24% | 16.60 | 5.51% |
| P128T8S10A1H8R# | 37.93 | 5.51% | 27.63 | 4.92% | 23.46 | 4.15% |
| P128T16S0A1H4R# | 115.20 | 0.79% | 91.57 | 0.43% | 71.80 | 0.74% |
| P128T16S0A1H6R# | 168.62 | 0.26% | 104.48 | 0.79% | 128.02 | 0.70% |
| P128T16S0A1H8R# | 262.50 | 0.78% | 258.67 | 0.24% | 265.67 | 0.65% |
| P128T16S20A1H4R# | 7.61 | 2.93% | 6.42 | 4.06% | 8.03 | 2.61% |
| P128T16S20A1H6R# | 12.44 | 4.68% | 11.43 | 2.12% | 19.49 | 2.17% |
| P128T16S20A1H8R# | 22.25 | 4.03% | 27.29 | 3.15% | 29.44 | 4.63% |

Table S3. Average solution time and Gap of the solutions sets applying a tolerance of 20%.

|  | Average solution times (sec.) & Gap | | | | | |
| --- | --- | --- | --- | --- | --- | --- |
|  | Level for precedence rules. | | | | |  |
|  | 0% | | 2.50% | | 5% | |
| Subset | **Time** | **Gap** | **Time** | **Gap** | **Time** | **Gap** |
| P16T8S0A1H4R# | 0.61 | 10.15% | 0.66 | 8.36% | 0.68 | 10.0% |
| P16T8S0A1H6R# | 1.14 | 10.55% | 0.81 | 13.90% | 0.75 | 15.5% |
| P16T8S0A1H8R# | 2.31 | 12.30% | 1.45 | 8.27% | 1.27 | 8.9% |
| P16T8S1A1H4R# | 1.33 | 4.35% | 0.65 | 8.85% | 0.66 | 10.1% |
| P16T8S1A1H6R# | 1.83 | 11.47% | 0.99 | 8.73% | 1.12 | 9.2% |
| P16T8S1A1H8R# | 2.40 | 10.73% | 1.44 | 5.91% | 1.63 | 5.4% |
| P16T16S0A1H4R# | 2.33 | 13.14% | 1.41 | 13.48% | 1.15 | 14.3% |
| P16T16S0A1H6R# | 4.85 | 9.70% | 2.79 | 9.59% | 2.59 | 8.7% |
| P16T16S0A1H8R# | 3.98 | 4.14% | 2.78 | 8.01% | 2.42 | 6.4% |
| P16T16S2A1H4R# | 1.96 | 10.57% | 1.06 | 8.60% | 1.10 | 10.1% |
| P16T16S2A1H6R# | 3.08 | 14.45% | 1.86 | 15.32% | 1.87 | 7.5% |
| P16T16S2A1H8R# | 5.13 | 7.30% | 3.54 | 7.92% | 2.84 | 4.0% |
| P32T8S0A1H4R# | 2.08 | 5.04% | 2.32 | 11.66% | 2.49 | 14.09% |
| P32T8S0A1H6R# | 4.74 | 10.67% | 4.35 | 11.28% | 4.35 | 10.91% |
| P32T8S0A1H8R# | 5.82 | 7.13% | 5.39 | 5.25% | 6.42 | 2.13% |
| P32T8S2A1H4R# | 1.91 | 5.79% | 1.59 | 6.05% | 1.49 | 13.74% |
| P32T8S2A1H6R# | 3.28 | 12.87% | 2.14 | 6.46% | 3.08 | 4.69% |
| P32T8S2A1H8R# | 6.99 | 5.40% | 11.13 | 6.39% | 6.29 | 4.26% |
| P32T16S0A1H4R# | 5.71 | 13.20% | 6.98 | 7.90% | 6.04 | 8.27% |
| P32T16S0A1H6R# | 11.23 | 11.17% | 11.63 | 13.98% | 12.19 | 7.61% |
| P32T16S0A1H8R# | 13.28 | 7.14% | 18.48 | 2.40% | 13.14 | 7.22% |
| P32T16S5A1H4R# | 3.20 | 10.36% | 2.26 | 6.59% | 2.39 | 10.07% |
| P32T16S5A1H6R# | 4.60 | 6.89% | 5.40 | 6.38% | 11.01 | 2.73% |
| P32T16S5A1H8R# | 4.51 | 5.37% | 7.96 | 5.27% | 6.33 | 7.91% |
| P64T8S0A1H4R# | 7.40 | 8.36% | 7.80 | 0.53% | 7.66 | 4.27% |
| P64T8S0A1H6R# | 16.02 | 0.83% | 17.47 | 4.06% | 16.46 | 5.20% |
| P64T8S0A1H8R# | 23.45 | 1.63% | 28.17 | 1.89% | 23.69 | 1.76% |
| P64T8S5A1H4R# | 3.45 | 6.01% | 5.02 | 5.71% | 2.88 | 4.06% |
| P64T8S5A1H6R# | 6.35 | 7.90% | 9.93 | 0.87% | 7.28 | 2.66% |
| P64T8S5A1H8R# | 8.87 | 6.00% | 8.77 | 2.35% | 13.47 | 4.17% |
| P64T16S0A1H4R# | 16.23 | 1.12% | 18.85 | 1.50% | 11.19 | 1.21% |
| P64T16S0A1H6R# | 29.76 | 0.57% | 29.97 | 1.10% | 31.02 | 1.42% |
| P64T16S0A1H8R# | 46.00 | 0.84% | 50.97 | 0.46% | 61.43 | 0.85% |
| P64T16S10A1H4R# | 3.74 | 3.64% | 2.45 | 2.27% | 3.41 | 4.09% |
| P64T16S10A1H6R# | 7.00 | 6.37% | 11.01 | 2.58% | 6.30 | 3.09% |
| P64T16S10A1H8R# | 13.47 | 2.46% | 45.85 | 3.46% | 8.50 | 7.86% |
| P128T8S0A1H4R# | 30.62 | 0.37% | 21.01 | 0.34% | 35.19 | 0.15% |
| P128T8S0A1H6R# | 60.76 | 0.56% | 65.59 | 0.51% | 70.09 | 0.87% |
| P128T8S0A1H8R# | 109.57 | 1.18% | 122.32 | 1.18% | 130.00 | 0.68% |
| P128T8S10A1H4R# | 8.21 | 1.83% | 4.42 | 7.60% | 5.58 | 8.02% |
| P128T8S10A1H6R# | 8.83 | 10.55% | 8.40 | 10.76% | 16.55 | 6.96% |
| P128T8S10A1H8R# | 27.58 | 8.07% | 27.72 | 4.92% | 23.15 | 7.84% |
| P128T16S0A1H4R# | 84.81 | 0.79% | 92.40 | 0.43% | 72.42 | 0.74% |
| P128T16S0A1H6R# | 129.65 | 0.26% | 104.28 | 0.79% | 128.31 | 0.70% |
| P128T16S0A1H8R# | 240.45 | 0.78% | 258.52 | 0.24% | 264.87 | 0.65% |
| P128T16S20A1H4R# | 7.40 | 4.62% | 6.34 | 4.06% | 7.99 | 2.61% |
| P128T16S20A1H6R# | 12.60 | 4.68% | 11.13 | 2.12% | 19.00 | 5.78% |
| P128T16S20A1H8R# | 21.98 | 4.03% | 27.21 | 3.15% | 28.95 | 7.35% |

Table S4. Time reduction according to the number of projects and requested gap

|  |  | Time reduction | | Actual GAP | |
| --- | --- | --- | --- | --- | --- |
| GAP | Projects | Mean | Median | Mean | Median |
| 10% | 16 | 64.25% | 63.50% | 4.67% | 4.78% |
| 10% | 32 | 77.56% | 80.00% | 2.84% | 2.50% |
| 10% | 64 | 75.44% | 72.50% | 2.00% | 1.57% |
| 10% | 128 | 73.75% | 81.50% | 2.17% | 1.18% |
| 20% | 16 | 75.42% | 79.00% | 9.61% | 9.40% |
| 20% | 32 | 81.64% | 83.00% | 7.90% | 7.14% |
| 20% | 64 | 80.11% | 79.00% | 3.14% | 2.52% |
| 20% | 128 | 74.97% | 83.50% | 3.23% | 1.51% |
